# Supplementary material for: Up-Regulation of Cyclooxygenase-2 (COX-2) Expression by Temozolomide (TMZ) in Human Glioblastoma (GBM) Cell Lines
Source: MDPI journal article supplement (doi:10.3390/ijms23031545), 2022-01-28
Supplement: s1 [file s1]

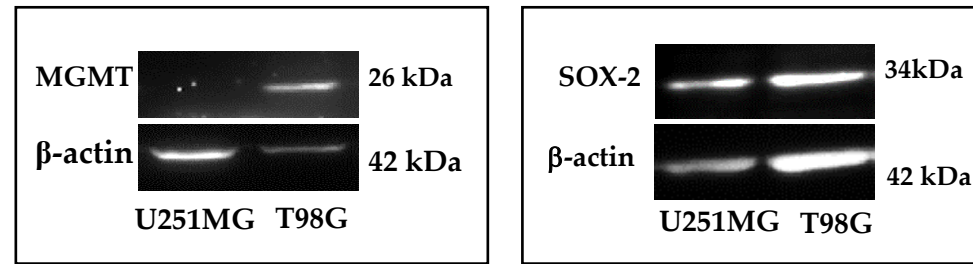

**Figure S1.** The O6-methylguanine DNA methyltransferase (MGMT) and SOX-2 basal expression in GBM cells. MGMT and SOX-2 levels were assayed in U251MG and T98G cell lines by Western blot.  $\beta$ -actin was used as the internal control. Images from one representative out of three independent experiments are presented.
